# Supplementary material for: A fluorescent sensor based on oyster mushroom-carbon dots for sensing nitroarenes in aqueous solutions
Source: Royal Society of Chemistry journal article supplement (doi:10.1039/d0nj02134b), 2020-01-01
Supplement: d0nj02134b1.pdf [file d0nj02134b1.pdf]

## Electronic Supporting Information (ESI)

# A fluorescent sensor from oyster mushroom-carbon dots for sensing nitroarenes in aqueous solutions

Muhammad Zulfajri,<sup>a,b</sup> Akhtar Rasool,<sup>c,d</sup> and Genin Gary Huang<sup>\*,a,e,f</sup>

<sup>a</sup>Department of Medicinal and Applied Chemistry, Kaohsiung Medical University, Kaohsiung 80708, Taiwan

<sup>b</sup>Department of Chemistry Education, Universitas Serambi Mekkah, Aceh 23245, Indonesia

<sup>c</sup>Toxicology Unit, Pharmacology and Toxicology Division, CSIR-Indian Institute of Chemical Technology, Hyderabad, India.

<sup>d</sup>Department of Environmental Sciences, Osmania University, Hyderabad 500007, India

<sup>e</sup>Department of Medical Research, Kaohsiung Medical University Hospital, Kaohsiung 80708, Taiwan

<sup>f</sup>Department of Chemistry, National Sun Yat-sen University, Kaohsiung 80424, Taiwan

\*To whom correspondence should be addressed.

E-mail : genin@kmu.edu.tw

Phone : +886-7-3121101#2810.

Fax : +886-7-3125339

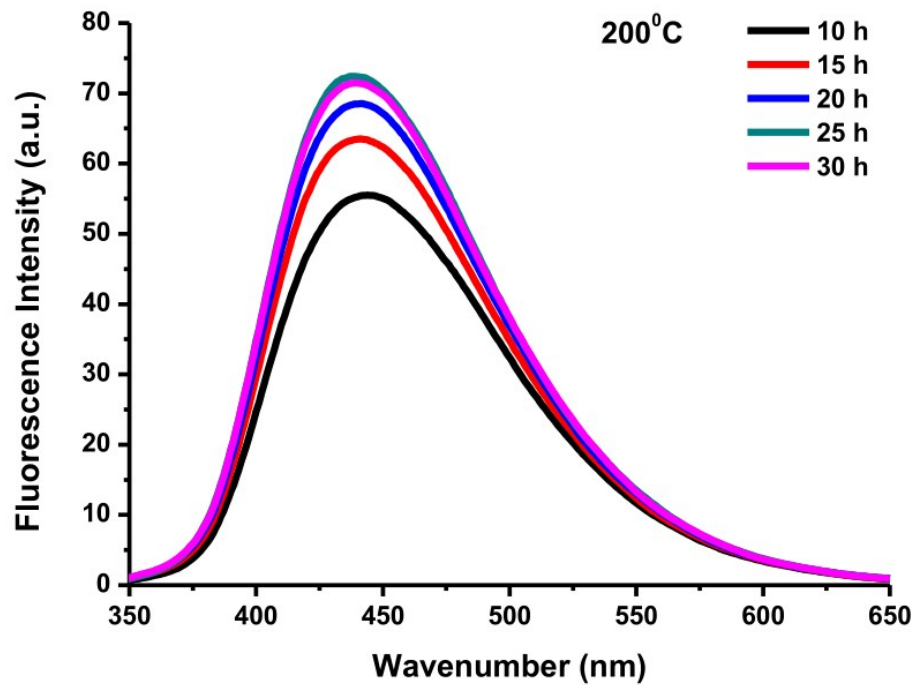

**Fig. S1** The comparison of fluorescence emission intensity of OM-CDs prepared at different reaction time durations with 200°C hydrothermal temperature (1.0 g OM powder, 15 mL ultrapure water).

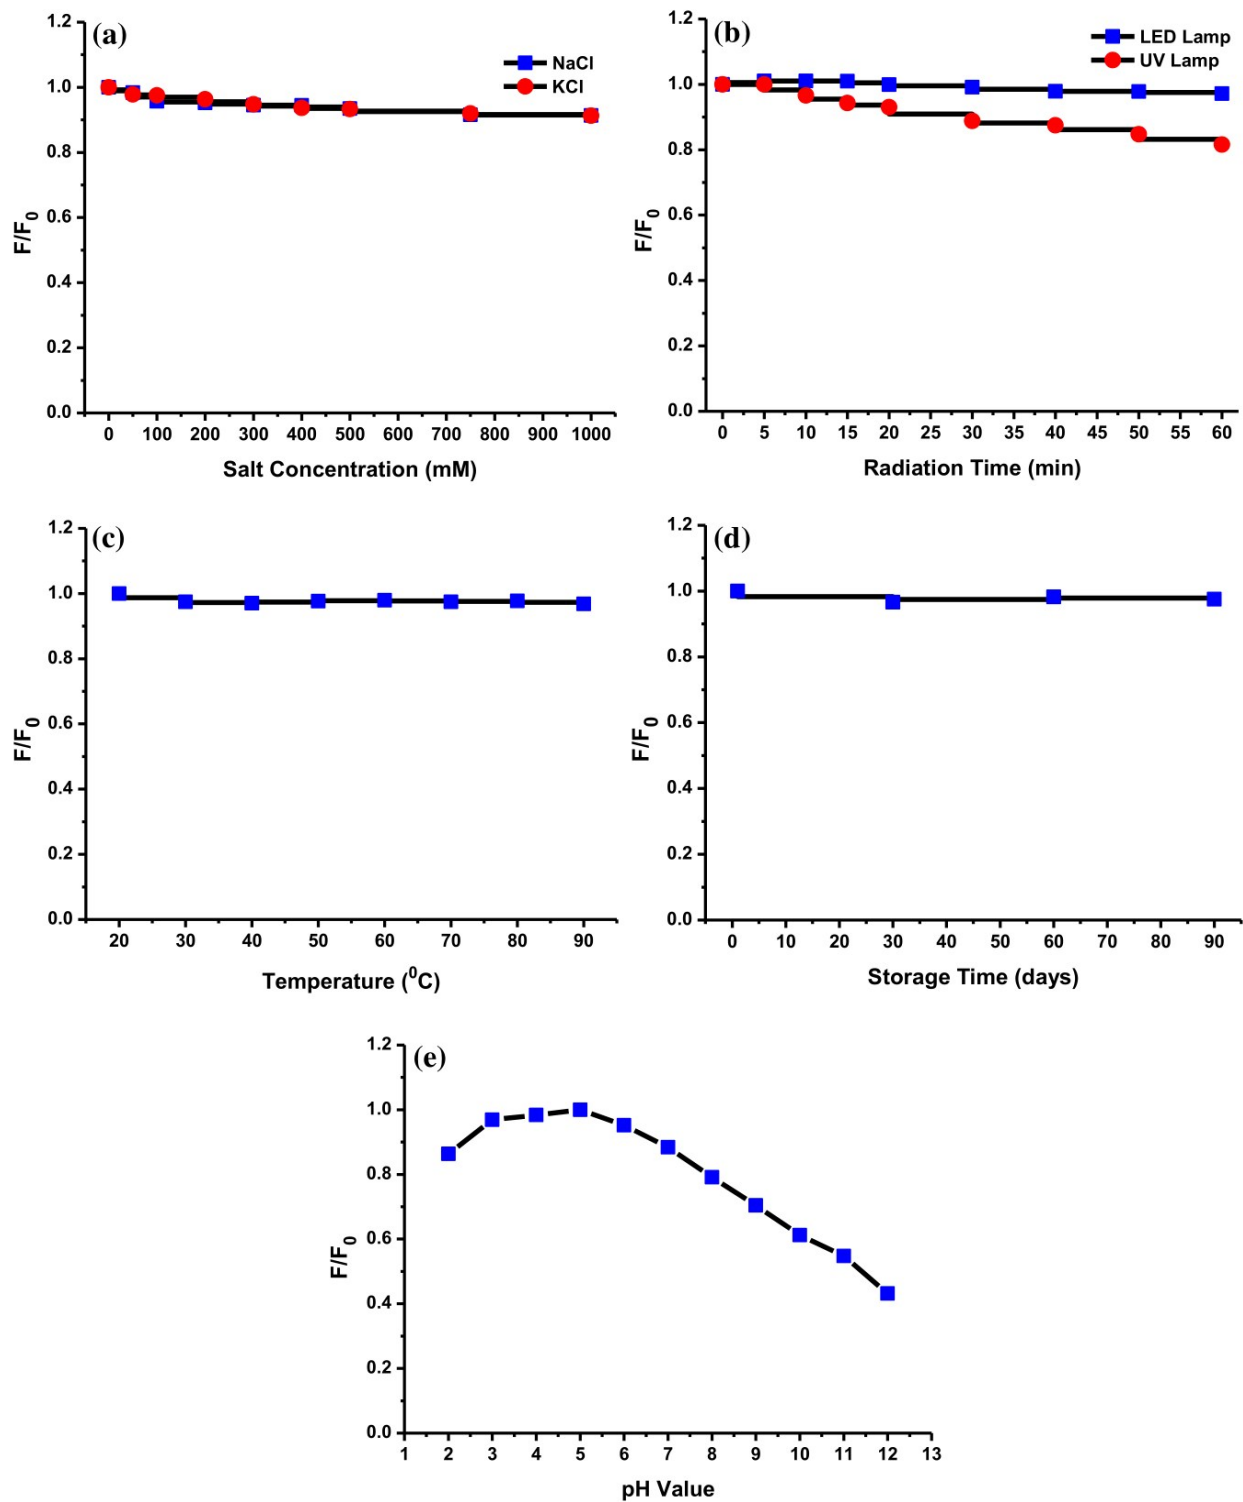

**Fig. S2** The fluorescence emission spectra comparison of OM-CDs under various salt concentrations (a), lamp irradiation times (b), heating temperatures (c), storage times (d), and pH values (e).

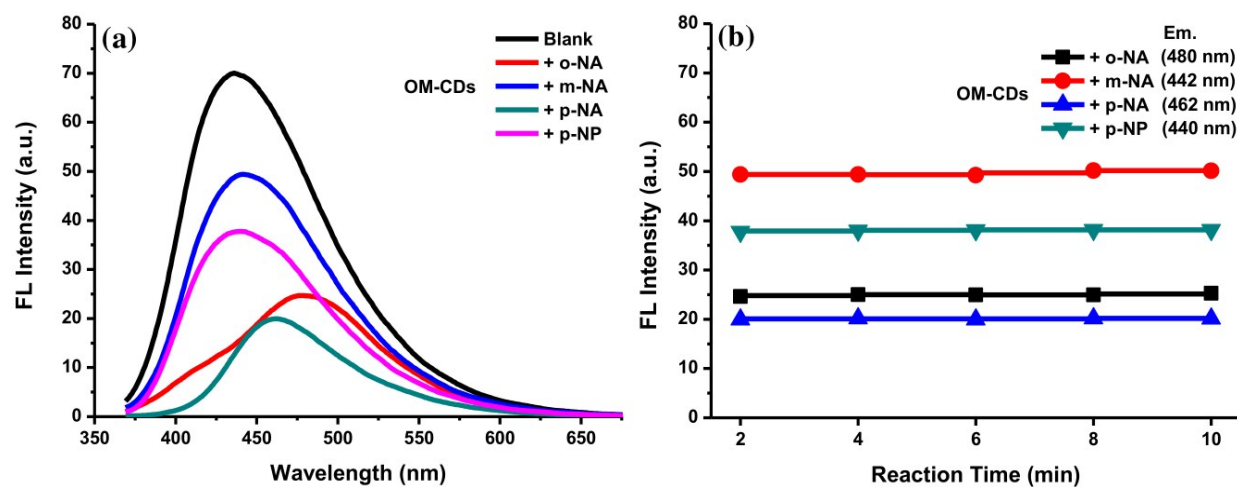

**Fig. S3** FL emission intensity of OM-CDs after adding NAs at 500  $\mu\text{M}$  (a) and FL emission intensity of OM-CDs/NAs with different interaction times (b).

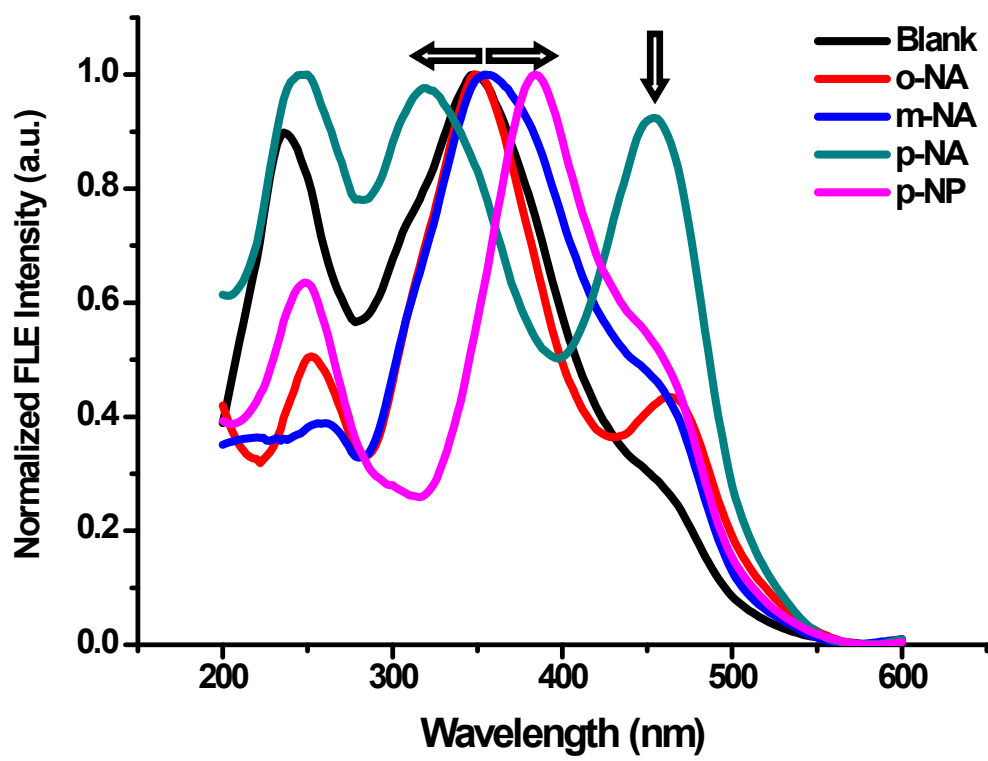

Fig. S4 The FLE spectra of OM-CDs (blank) and after the addition of NAs.

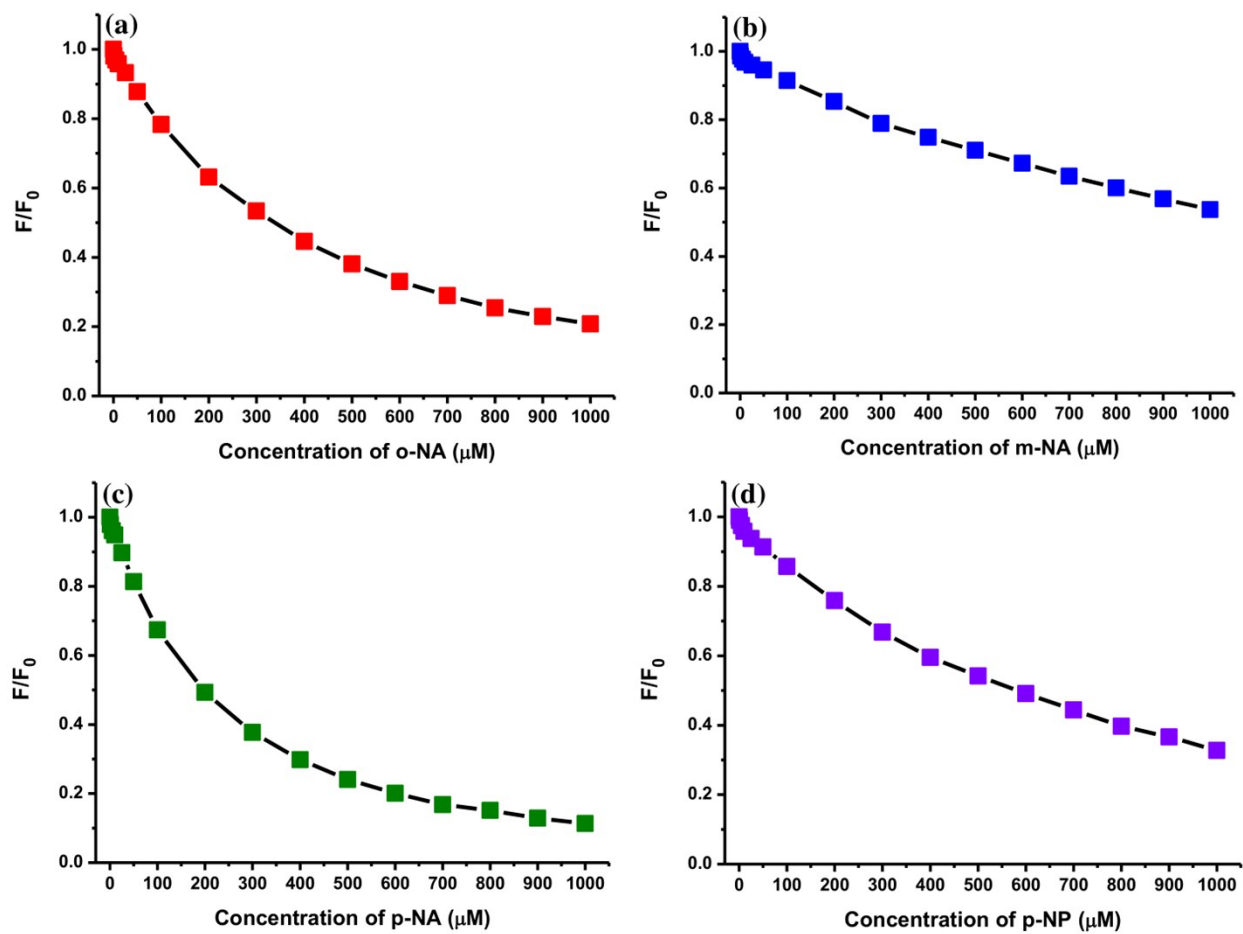

**Fig. S5** Plots of  $F/F_0$  with the concentration of NAs ranging from 1 to 1000  $\mu\text{M}$  with 360 nm excitation.

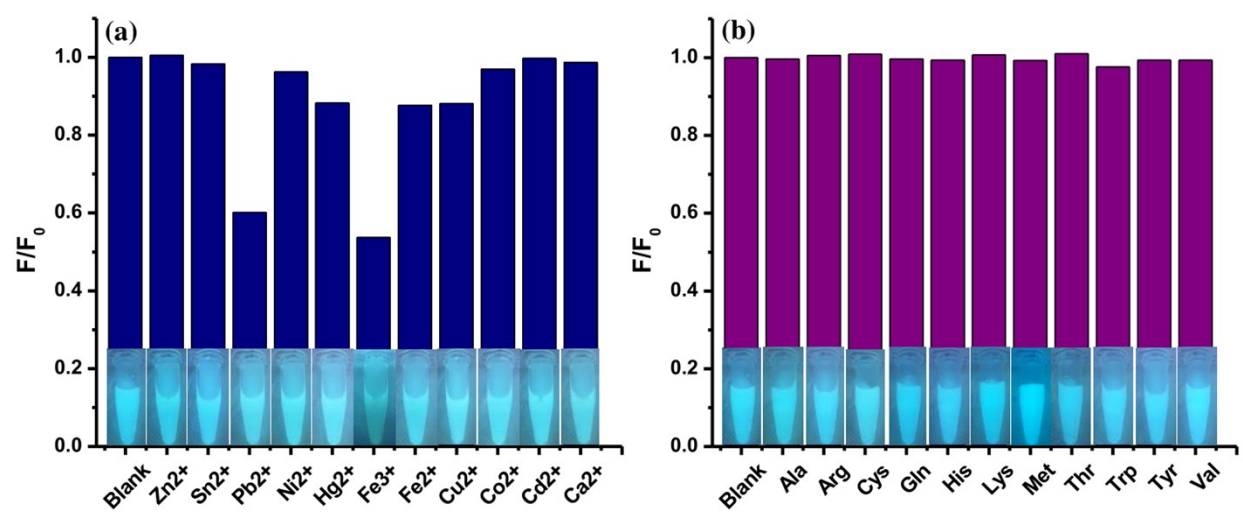

**Fig. S6** Relative FL intensities ( $F/F_0$ ) of OM-CDs solution in the presence of (a) metal ions and (b) amino acids.

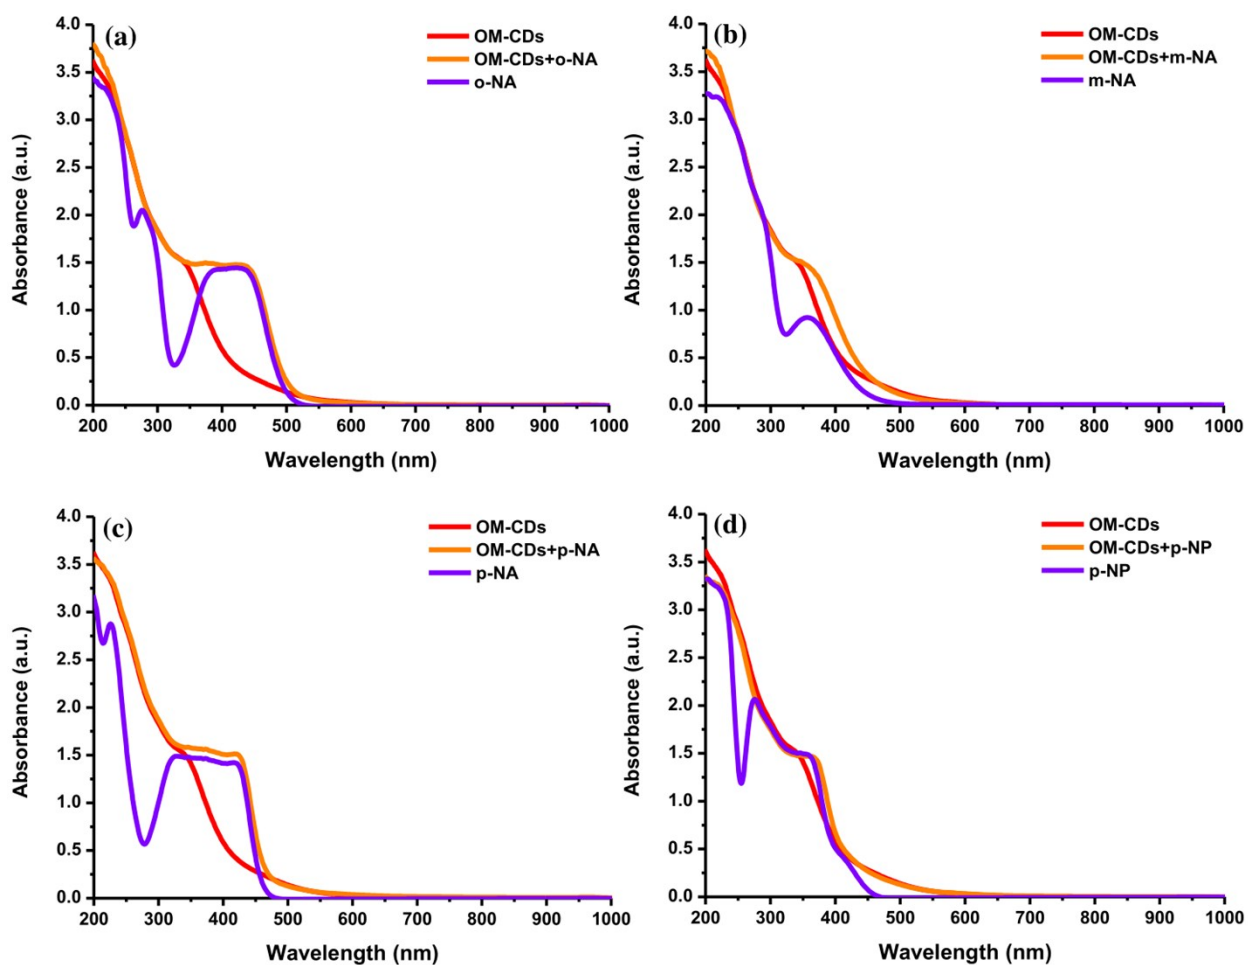

**Fig. S7** UV-Vis absorption spectra of OM-CDs, NAs, and OM-CDs + NAs system.



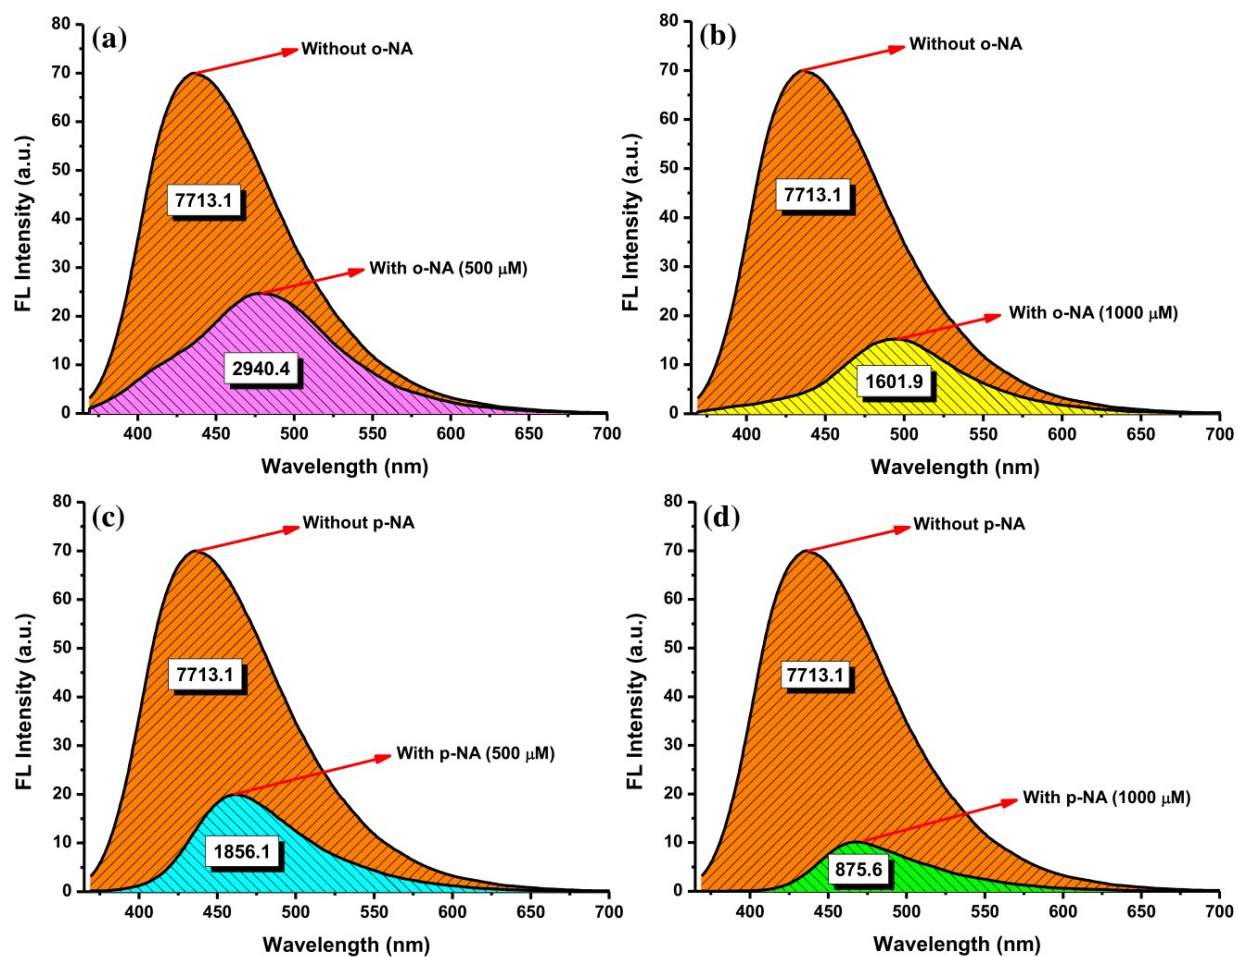

**Fig. S8** FRET efficiency at the excitation wavelength at 360 nm. The integrated FL intensity was calculated from 360 nm to 700 nm with (a) 500  $\mu\text{M}$  o-NA, (b) 1000  $\mu\text{M}$  o-NA, (c) 500  $\mu\text{M}$  m-NA, and (d) 1000  $\mu\text{M}$  m-NA.

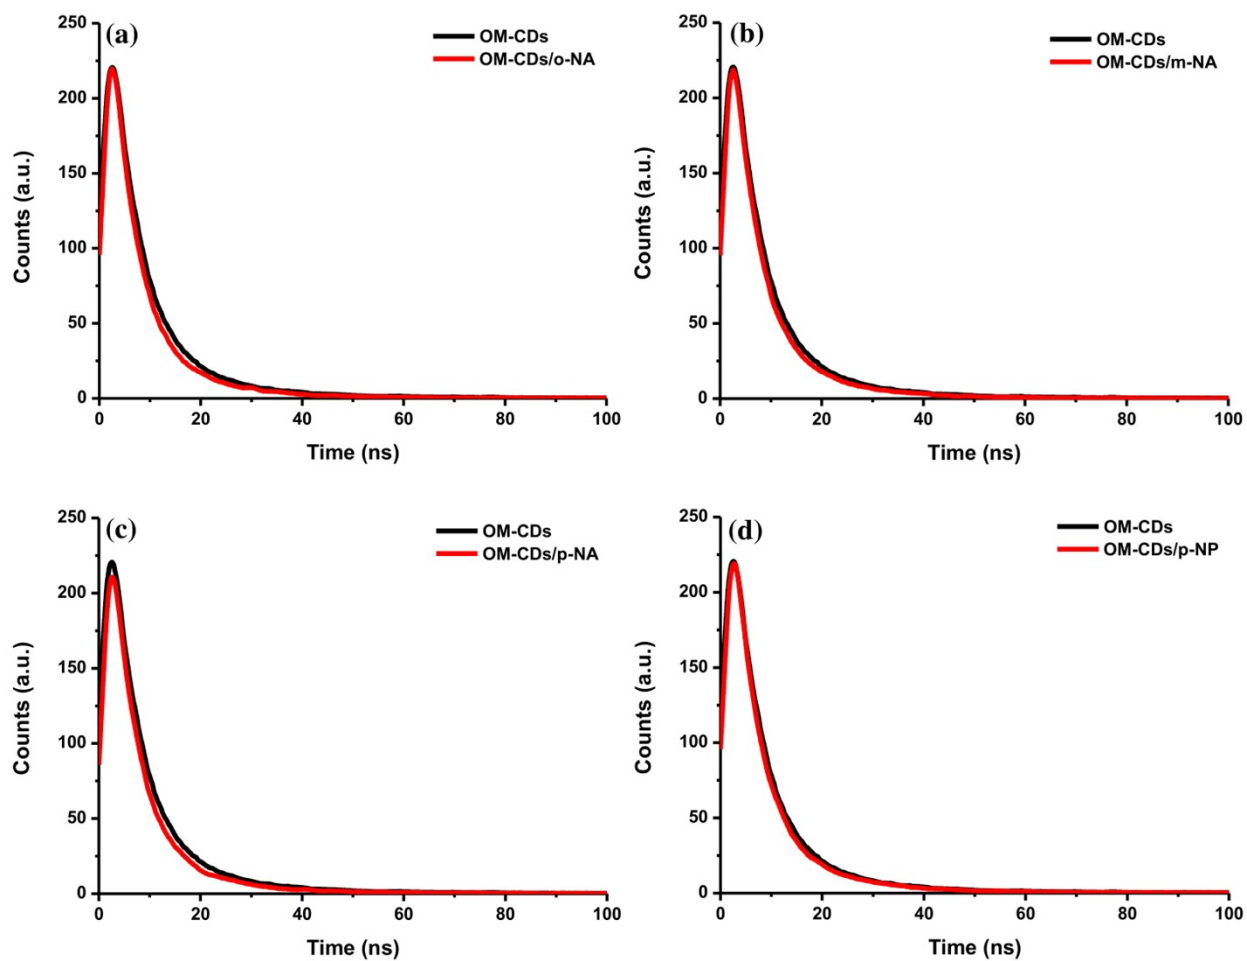

**Fig. S10** The FL decay profiles of OM-CDs solution before (black) and after (red) addition of (a) o-NA, (b) m-NA, (c) p-NA, and (d) p-NP.

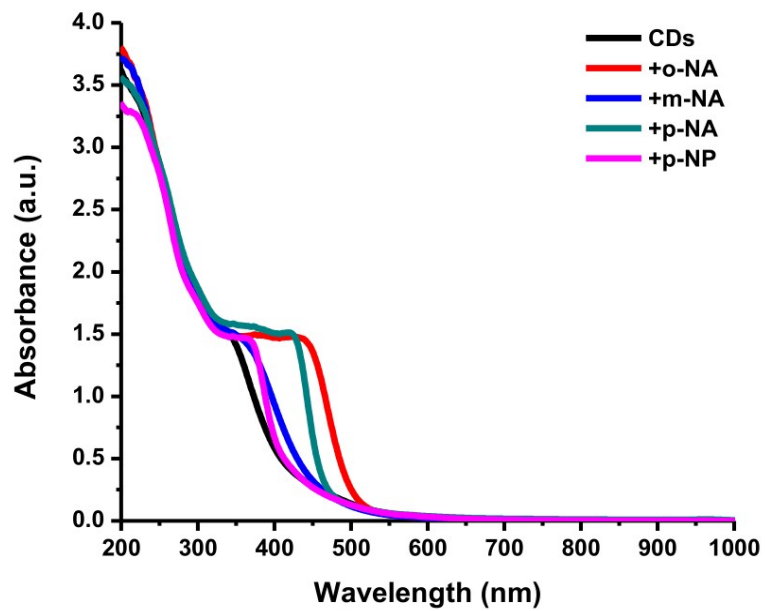

**Fig. S10** The UV-vis spectra of OM-CDs in the addition of NAs at the concentration of 1000 μM.

**Table S1.** Comparisons of this method with other methods for the sensing of o-NA, m-NA, p-NA, and p-NP.

| No | Method                               | Target | Conc. Range ( $\mu\text{M}$ ) | LOD ( $\mu\text{M}$ ) | Ref.      |
|----|--------------------------------------|--------|-------------------------------|-----------------------|-----------|
| 1  | Anthracene-MOF                       |        | 0-652                         | 0.75                  | 1         |
| 2  | LS-SVM with CPE                      |        | 0.72-109                      | 0.36                  | 2         |
| 3  | PMME - HPLC                          | o-NA   | 0.72-1000                     | 0.13                  | 3         |
| 4  | Opt. Membrane (DNAL/PPP)             |        | 0.4-400                       | 0.10                  | 4         |
| 5  | OM-CDs                               |        | 1-100                         | 0.78                  | This work |
| 6  | LS-SVM with CPE                      |        | 1.45-145                      | 0.58                  | 2         |
| 7  | PMME - HPLC                          |        | 0.36-7.24                     | 0.06                  | 3         |
| 8  | CZE-AD                               | m-NA   | 0.045-1810                    | 0.01                  | 5         |
| 9  | CEC-AD                               |        | -                             | 1.46                  | 6         |
| 10 | OM-CDs                               |        | 10-300                        | 2.29                  | This work |
| 11 | LS-SVM with CPE                      |        | 0.72-123                      | 0.43                  | 2         |
| 12 | TPA-[Zn(bpba)(NO <sub>3</sub> )] (1) |        | 0-40                          | 0.72                  | 7         |
| 13 | Eu-MOF                               | p-NA   | 10-140                        | 0.72                  | 8         |
| 14 | TPDC-DB                              |        | 0-60                          | 3.29                  | 9         |
| 15 | OM-CDs                               |        | 1-100                         | 0.50                  | This work |
| 16 | Zn-MOF                               |        | 0-35                          | 4.74                  | 10        |
| 17 | CHT/ZnO NDs-electrode                |        | 0.5-400.6                     | 0.23                  | 11        |
| 18 | Ag NCs-PEI                           | p-NP   | 5-140                         | 1.28                  | 12        |
| 19 | $\beta$ -CD@ZnO QDs                  |        | 1-40                          | 0.34                  | 13        |
| 20 | OM-CDs                               |        | 10-300                        | 1.56                  | This work |

Stands for abbreviations:

**Anthracene-MOF** : anthracene-based metal–organic framework

**LS-SVM with CPE** : Least-squares support vector machines after cloud point extraction

**PMME – HPLC** : Polymer monolith microextraction coupled with HPLC

**Opt. Membrane (DNAL/PPP)** : Optical membrane (1,2-di(1-naphthyl)acetate/polymer poly(p-phenylene ethynylene))

**CZE-AD** : Capillary zone electrophoresis with amperometric detection

**CEC-AD** : Cation-exchange chromatography with amperometric detection

**TPA-[Zn(bpba)(NO<sub>3</sub>)] (1)** : triphenylamine- functionalized material [Zn(bpba)(NO<sub>3</sub>)] (1) (Hbpba = 4-(bis(4-(pyridin-4-yl)phenyl)amino)benzoic acid)

**Eu-MOF** : Eu-based metal-organic framework

**TPDC-DB** : tetraphenyl-5,5-dioctylcyclopentadiene

**Zn-MOF** : Zn(II)-based metal-organic framework

**CHT/ZnO NDs-electrode** : Chitosan/zinc oxide nanoneedles modified electrode

**Ag NCs-PEI** : Ag nanoclusters templated by hyperbranched polyethyleneimine

**$\beta$ -CD@ZnO QDs** :  $\beta$ - cyclodextrin-capped ZnO quantum dots

**OM-CDs** : oyster mushroom-carbon dots

**Table S2.** The determination of NAs in underground water samples (n = 3).

| Target | Added ( $\mu\text{M}$ ) | Found ( $\mu\text{M}$ ) | Recovery (%) | RSD (%) |
|--------|-------------------------|-------------------------|--------------|---------|
| o-NA   | 25                      | 24.73                   | 98.92        | 0.46    |
|        | 50                      | 48.63                   | 97.26        | 0.38    |
|        | 75                      | 73.68                   | 98.23        | 0.40    |
|        | 100                     | 97.53                   | 97.53        | 0.74    |
|        | 150                     | 145.81                  | 97.20        | 0.72    |
| m-NA   | 25                      | 25.10                   | 100.42       | 0.71    |
|        | 50                      | 50.03                   | 100.06       | 0.44    |
|        | 75                      | 75.75                   | 101.00       | 0.45    |
|        | 100                     | 101.75                  | 101.75       | 0.85    |
|        | 150                     | 153.12                  | 102.08       | 0.39    |
| p-NA   | 25                      | 25.39                   | 101.54       | 0.62    |
|        | 50                      | 49.90                   | 99.81        | 0.51    |
|        | 75                      | 75.95                   | 101.26       | 0.56    |
|        | 100                     | 102.60                  | 102.60       | 0.80    |
|        | 150                     | 149.23                  | 99.48        | 1.20    |
| p-NP   | 25                      | 24.86                   | 99.43        | 0.23    |
|        | 50                      | 49.84                   | 99.69        | 0.22    |
|        | 75                      | 74.47                   | 99.29        | 0.36    |
|        | 100                     | 99.91                   | 99.91        | 0.62    |
|        | 150                     | 151.13                  | 100.75       | 0.49    |

## References

- 1 J. H. Wang, G. Y. Li, X. J. Liu, R. Feng, H. J. Zhang, S. Y. Zhang and Y. H. Zhang, *Inorganica Chim. Acta*, 2018, **473**, 70–74.
- 2 A. Niazi, J. Ghasemi and A. Yazdanipour, *Spectrochim. Acta - Part A Mol. Biomol. Spectrosc.*, 2007, **68**, 523–530.
- 3 P. Xiao, C. Bao, Q. Jia, R. Su, W. Zhou and J. Jia, *J. Sep. Sci.*, 2011, **34**, 675–680.
- 4 H. M. Huang, K. M. Wang, S. S. Huang, L. J. Zhou and D. Li, *Anal. Chim. Acta*, 2003, **481**, 109–117.
- 5 X. Guo, J. Lv, W. Zhang, Q. Wang, P. He and Y. Fang, *Talanta*, 2006, **69**, 121–125.
- 6 Y. Zhu, M. Wang, H. Du, F. Wang, S. Mou and P. R. Haddad, *J. Chromatogr. A*, 2002, **956**, 215–220.
- 7 N. N. Ji, Z. Q. Shi, H. L. Hu and H. G. Zheng, *Dalt. Trans.*, 2018, **47**, 7222–7228.
- 8 Y. Pu, Z. Yu, F. Wang, Y. Fu, T. Yan and H. Cheng, *Sens. Rev.*, 2018, **39**, 149–161.
- 9 A. Deshmukh, S. Bandyopadhyay, A. James and A. Patra, *J. Mater. Chem. C*, 2016, **4**, 4427–4433.
- 10 J. Wang, Q. Zha, G. Qin and Y. Ni, *Talanta*, 2020, **211**, 120742.
- 11 B. Thirumalraj, C. Rajkumar, S. M. Chen and K. Y. Lin, *J. Colloid Interface Sci.*, 2017, **499**, 83–92.
- 12 F. Qu, P. Chen, S. Zhu and J. You, *Spectrochim. Acta - Part A Mol. Biomol. Spectrosc.*, 2017, **171**, 449–453.
- 13 S. Geng, S. M. Lin, S. G. Liu, N. B. Li and H. Q. Luo, *RSC Adv.*, 2016, **6**, 86061–86067.
